# Supplementary material for: UK B.1.1.7 variant exhibits increased respiratory replication and shedding in nonhuman primates
Source: PubMed Central journal article supplement (PMC8219096; doi:10.1101/2021.06.11.448134), 2021-06-13
Supplement: NIHPP2021.06.11.448134V1-supplement-1.pdf [file NIHPP2021.06.11.448134V1-supplement-1.pdf]

## 1 **Materials and Methods**

2 **Biosafety and ethics.** All SARS-CoV-2 studies were approved by the Institutional Biosafety  
3 Committee (IBC) and performed in high biocontainment (BSL3/BSL4) at Rocky Mountain  
4 Laboratories (RML), NIAID, NIH. All sample processing in high biocontainment and sample  
5 removal followed IBC-approved Standard Operating Protocols (SOPs) (1). All experiments  
6 involving AGMs were performed in strict accordance with approved Institutional Animal Care  
7 and Use Committee protocols and following recommendations from the Guide for the Care and  
8 Use of Laboratory Animals of the Office of Animal Welfare, National Institutes of Health and  
9 the Animal Welfare Act of the US Department of Agriculture, in an Association for Assessment  
10 and Accreditation of Laboratory Animal Care International (AAALAC)-accredited facility.  
11 AGMs were placed in a climate-controlled room with a fixed 12-hour light-dark cycle. Animals  
12 were singly housed in adjacent primate cages allowing social interactions and provided with  
13 commercial monkey chow, treats, and fruit twice daily with water *ad libitum*. Environmental  
14 enrichment was provided with a variety of human interaction, manipulanda, commercial toys,  
15 movies, and music. AGMs were monitored at least twice daily throughout the study.

16 **Virus and cells.** SARS-CoV-2 isolate SARS-CoV-2/human/USA/RML-7/2020 (MW127503.1),  
17 strain D614G, was obtained from a nasopharyngeal swab obtained on July 19, 2020. Sequencing  
18 of the viral stock showed it to be 100% identical to the deposited Genbank sequence and no  
19 contaminants were detected (2). SARS-CoV-2 variant B.1.1.7 (hCoV-  
20 19/England/204820464/2020, EPI\_ISL\_683466) was obtained from Public Health England via  
21 BEI Resources (Manassas, VA, USA). The supplied passage 2 material was propagated once in

22 Vero E6 cells. Sequencing confirmed the presence of three SNPs in this stock: nsp6 D156G  
23 (present in 14% of all reads), nsp6 L257F (18%) and nsp7 V11I (13%) (3).

24 Virus propagation was performed in Vero E6 cells in DMEM (Sigma-Aldrich, St Louis, MO,  
25 USA) supplemented with 2% fetal bovine serum, 1 mM L-glutamine, 50 U/ml penicillin and 50  
26 µg/ml streptomycin (DMEM2). Vero E6 cells were maintained in DMEM supplemented with  
27 10% fetal bovine serum, 1 mM L-glutamine, 50 U/ml penicillin and 50 µg/ml streptomycin  
28 (DMEM10). Mycoplasma testing of cell lines and viral stocks is performed regularly, and no  
29 mycoplasma was detected.

30 **Study design.** Eleven SARS-CoV-2 seronegative AGMs (3.8-6.7 kg) were divided into 2 groups  
31 for infection with either the contemporary D614G strain (RML7) (n=5) or the recently emerged  
32 B.1.1.7 (UK variant) (n=6). A Nasal Mucosal Atomization Device (Teleflex, MAD110) was  
33 used to deliver  $10^6$  infectious particles ( $5 \times 10^5$  per naris diluted in 500ul DMEM with no  
34 additives). Clinical examinations were performed on days 0, 1, 3, 5 and 7. Blood and serum were  
35 collected for hematology, blood chemistry, coagulation and virological analysis. Oral, nasal and  
36 rectal swabs were collected at every examination for virological analysis. Bronchial cytology  
37 brushes were collected on days 3, 5 and 7 and bronchioalveolar lavage (BAL) samples were also  
38 collected on days 3 and 5 for virological analysis. Tissues were collected following euthanasia  
39 on day 7 for pathology and virological analysis. Studies were performed in successive weeks and  
40 different animal study groups to avoid contamination between studies, the D416G study was run  
41 first followed by the B.1.1.7 study.

42 **Virus titration.** Virus isolation was performed on tissues following homogenization in 1 mL  
43 DMEM using a TissueLyser (Qiagen, Germantown, MD, USA) and inoculating Vero E6 cells in

44 a 96 well plate with 200  $\mu$ L of 1:10 serial dilutions of the homogenate. One hour following  
45 inoculation of cells, the inoculum was removed and replaced with 200  $\mu$ L DMEM. Virus  
46 isolation of blood and swab samples were performed in a similar manner. Samples were vortexed  
47 for 30 seconds before performing the 1:10 dilution series. The inoculum (200ul) was placed on  
48 cells and rocked for 1h. Infectious supernatant was removed and replaced with fresh DMEM.  
49 Seven days following inoculation, cytopathogenic effect was scored and the TCID<sub>50</sub> was  
50 calculated using the Reed-Muench formula (4).

51 **Viral RNA detection.** qPCR was performed on RNA samples extracted from swabs or tissues  
52 using QiaAmp Viral RNA or RNeasy kits, respectively (Qiagen, Germantown, MD, USA). Viral  
53 RNA was detected with one-step real-time RT-PCR assays designed to amplify total viral RNA  
54 (N gene) (5) or sgRNA by amplifying a region of E gene to detect replicating virus (6). Dilutions  
55 of RNA standards counted by droplet digital PCR were run in parallel and used to calculate viral  
56 RNA genome copies. A Rotor-Gene probe kit (Qiagen, Germantown, MD, USA) was used to run  
57 the PCRs according to the instructions of the manufacturer.

58 **Hematology, Serum Chemistry and Coagulation.** Hematology analysis was completed on a  
59 ProCyte DX (IDEXX Laboratories, Westbrook, ME, USA) and the following parameters were  
60 evaluated: red blood cells (RBC), hemoglobin (Hb), hematocrit (HCT), mean corpuscular  
61 volume (MCV), mean corpuscular hemoglobin (MCH), mean corpuscular hemoglobin  
62 concentration (MCHC), red cell distribution weight (RDW), platelets, mean platelet volume  
63 (MPV), white blood cells (WBC), neutrophil count (abs and %), lymphocyte count (abs and %),  
64 monocyte count (abs and %), eosinophil count (abs and %), and basophil count (abs and %).  
65 Serum chemistries were completed on a VetScan VS2 Chemistry Analyzer (Abaxis, Union City,  
66 CA, USA) and the following parameters were evaluated: glucose, blood urea nitrogen (BUN),

67 creatinine, calcium, albumin, total protein, alanine aminotransferase (ALT), aspartate  
68 aminotransferase (AST), alkaline phosphatase (ALP), total bilirubin, globulin, sodium,  
69 potassium, chloride, and total carbon dioxide. Coagulation values were determined from citrated  
70 plasma utilizing a STart4 Hemostatis Analyzer and associated testing kits (Diagnostica Stago,  
71 Parsippany, NJ, USA).

72 **Cytokine analyses.** Concentrations of cytokines and chemokines present in the serum from  
73 SARS-CoV-2 infected AGMs were quantified using a multiplex bead-based assay (1:4 dilution)-  
74 the LEGENDPlex Non-Human Primate Cytokine/Chemokines 13-plex (BioLegend, San Diego,  
75 CA USA). Analytes detected by this panel are the following: IFN- $\gamma$ , IL-1 $\beta$ , IL-6, IL-8, MCP-1,  
76 MIP-1 $\alpha$ , MIP-1 $\beta$ , MIG, TNF- $\alpha$ , I-TAC, RANTES, IP-10, and Eotaxin. Samples were diluted 1:4  
77 in duplicate prior to processing according the manufacturer's instructions. Samples were read  
78 using the BD FACS Symphony instrument (BD Biosciences, San Jose, CA USA) and analyzed  
79 using LEGENDplex<sup>TM</sup> Data Analysis Software following data acquisition.

80 **Thoracic radiographs.** Ventro-dorsal and right/left lateral radiographs were taken on clinical  
81 exam days prior to any other procedures (e.g. bronchoalveolar lavage, nasal flush). Radiographs  
82 were evaluated and scored for the presence of pulmonary infiltrates by two board-certified  
83 clinical veterinarians according to a previously published standard scoring system (7). Briefly,  
84 each lung lobe (upper left, middle left, lower left, upper right, middle right, lower right) was  
85 scored individually based on the following criteria: 0 = normal examination; 1 = mild interstitial  
86 pulmonary infiltrates; 2 = moderate interstitial pulmonary infiltrates, perhaps with partial cardiac  
87 border effacement and small areas of pulmonary consolidation (alveolar patterns and air  
88 bronchograms); and 3 = pulmonary consolidation as the primary lung pathology, seen as a  
89 progression from grade 2 lung pathology. At study completion, thoracic radiograph findings

90 were reported as a single radiograph score for each animal on each exam day. To obtain this  
91 score, the scores assigned to each of the six lung lobes were added together and recorded as the  
92 radiograph score for each animal on each exam day. Scores range from 0 to 18 for each animal  
93 on each exam day.

94 **Histology and Immunohistochemistry.** Tissues were fixed in 10 % neutral buffered formalin  
95 with two changes, for a minimum of 7 days according to an IBC-approved SOP. Tissues were  
96 processed with a Sakura VIP-6 Tissue Tek, on a 12-hour automated schedule, using a graded  
97 series of ethanol, xylene, and PureAffin. Embedded tissues were sectioned at 5  $\mu$ m and dried  
98 overnight at 42°C prior to staining with hematoxylin and eosin. Specific staining was detected  
99 using SARS-CoV/SARS-CoV-2 nucleocapsid antibody (Sino Biological cat#40143-MM05) at a  
100 1:1000 dilution. The tissues were processed for immunohistochemistry using the Discovery  
101 Ultra automated stainer (Ventana Medical Systems) with a ChromoMap DAB kit (Roche Tissue  
102 Diagnostics cat#760–159) (Roche Diagnostics Corp., Indianapolis, IN, USA).

103 **Statistical analyses.** Statistical analysis was performed in Prism 8 (GraphPad, San Diego, CA,  
104 USA). Multiple t-tests were used to assess statistical significance between the two infection  
105 groups.

106

107

108

109

110

## 111 Supplementary Figures

112

Fig S1

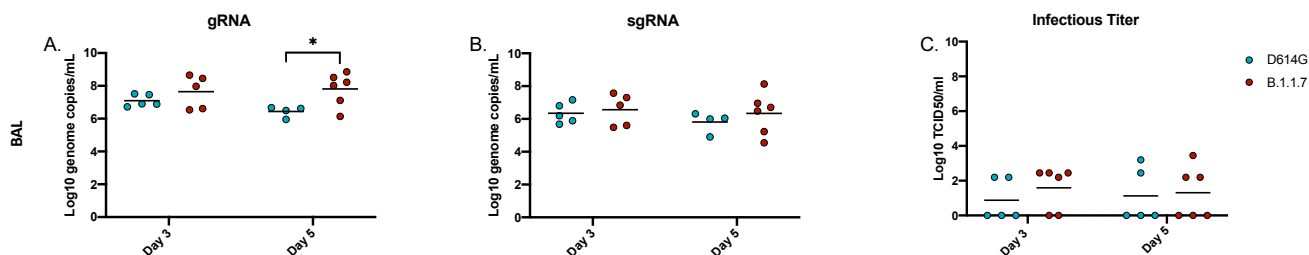

113

### 114 Figure S1: Viral loads in the lower respiratory system (BAL).

115 AGMs were infected with either the D614G or B.1.1.7 SARS-CoV-2 variant intranasally  
116 utilizing a Nasal Mucosal Atomization Device. Bronchioalveolar lavage (BAL) samples were  
117 collected on days 3 and 5 post-infection and measured for gRNA, sgRNA and infectious titers.  
118 (A-C) A significant difference in gRNA collected in BAL samples was detected on day 5 post-  
119 infection (\*p-value < 0.05), no other significant differences were detected. Multiple t-tests were  
120 used to compare groups.

121

122

123

124

Fig S2

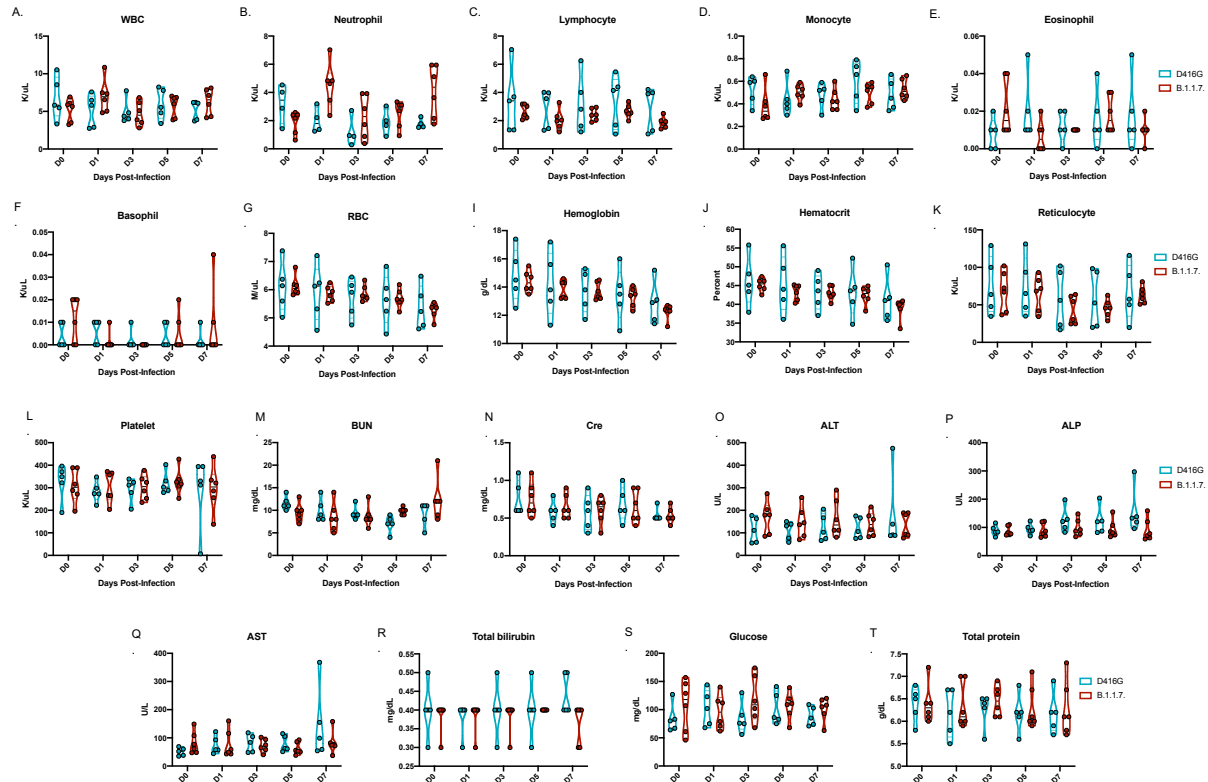

125

126 **Figure S2: Hematology and blood chemistry following infection.** Whole blood and serum  
127 samples were collected at each exam time point (days 0, 1, 3, 5 and 7) for hematology (A-L) and  
128 blood chemistry analyses (M-T). No significant changes were found in hematology (A-L), nor in  
129 blood chemistry (M-T).

130

131

Fig S3

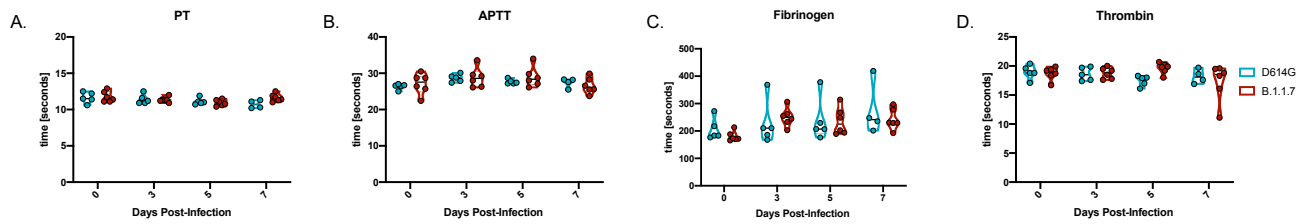

132

133 **Figure S3: Coagulation assays following infection.** Plasma samples were collected at each  
134 clinical time point (days 0, 1, 3, 5 and 7) to evaluate coagulation parameters between infected  
135 animals (A-D). No significant changes were found in PT (A), APTT (B), fibrinogen (C) or  
136 thrombin (D).

137

138

139

140

141



Fig S4

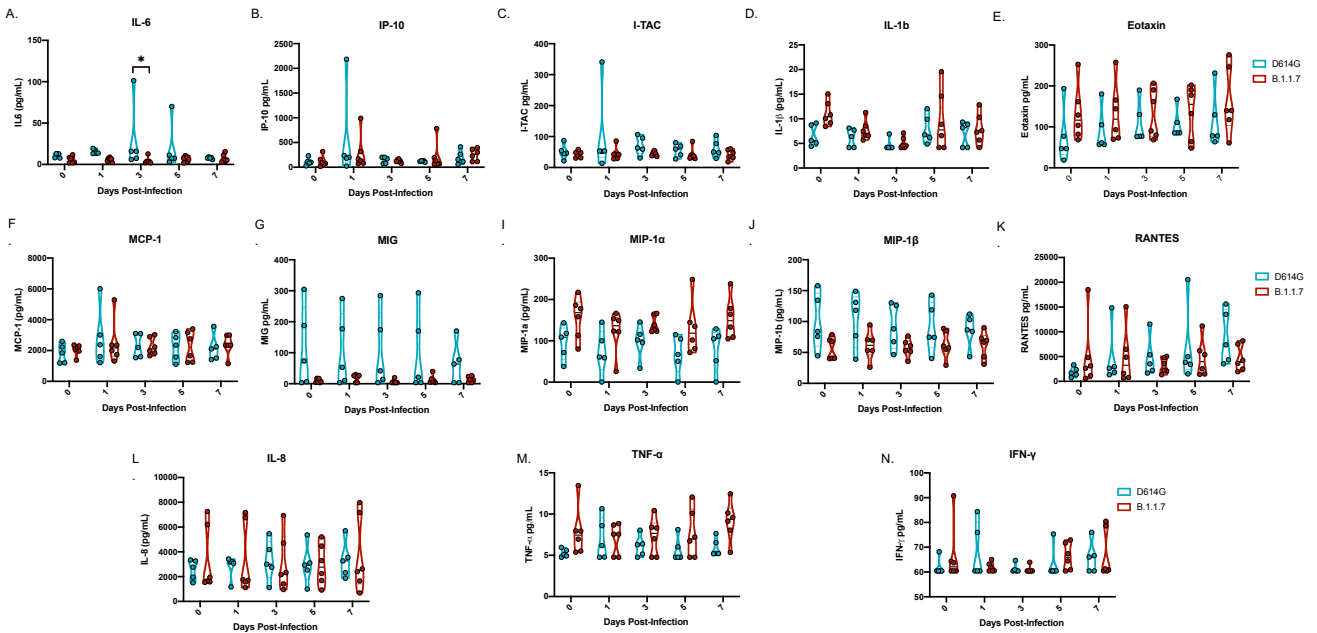

142

143 **Figure S4: Cytokine analyses following infection.** Serum was collected on days 0, 1, 3, 5 post-  
144 infection for cytokine analyses. Three notable changes were detected. Levels of IL-6 were  
145 significantly different 3 days post-infection between the two groups (\*p-value 0.05) (A).  
146 Differences at 1 day post-infection were noted in both IP-10 (B) and I-TAC (C) but were not  
147 significant. Samples were analyzed by 2-way ANOVA to determine significance.

Table S1

|         | ID      | Day 0-3                                                                                  | Day 4-7                                                                                                            | Necropsy notes                                                                                                                                                                                                             |
|---------|---------|------------------------------------------------------------------------------------------|--------------------------------------------------------------------------------------------------------------------|----------------------------------------------------------------------------------------------------------------------------------------------------------------------------------------------------------------------------|
| D.6.46  | CoV 499 | Clear nasal discharge, reduced appetite<br>Score:0/8/5/5                                 | Severely reduced appetite<br>Score: 5/5/5/5                                                                        | Lung weight: 38.34g/animal 6.70kg<br>RML dorsal 10%;10% ventral; accessory lobe ventral 30%; LML 30% ventral, LLL dorsal 5%, ventral 10%,<br>Peritoneal cavity: fibrin tags<br>Pleural cavity: adhesions<br>Lung adhesions |
|         | CoV 500 | Reduced appetite<br>Score:0/0/3/5                                                        | Reduced appetite<br>Score:5/5/5/5                                                                                  | Lung weight: 26.38g/animal 4.29kg<br>LLL ventral 10%                                                                                                                                                                       |
|         | CoV 501 | Reduced appetite, slightly irregular respirations day 3<br>Score: 0/5/8/10               | Reduced appetite, slightly irregular Abdominal respirations, slow, hunched posture, ruffled fur<br>Score: 13/5/5/5 | Lung weight: 21.06g/animal 3.36kg<br>RML ventral 5%, dorsal 30%<br>Fibrous adhesions                                                                                                                                       |
|         | CoV 502 | Reduced appetite,<br>Score: 0/3/3/0                                                      | Reduced appetite<br>Score: 0/3/0/3                                                                                 | Lung weight: 24.73g/animal 4.86kg<br>Lung FTC, adhesions, RML ventral 10%; RLL dorsal 50%<br>Liver pale                                                                                                                    |
|         | CoV 503 | Reduced appetite, pale appearance,<br>Score: 0/3/0/3                                     | Reduced appetite, slightly increased abdominal respirations<br>Score: 3/8/3/3                                      | Lung weight:24.27g/animal 5.71kg<br>RML ventral 10%<br>Liver pale                                                                                                                                                          |
| B.1.1.7 | CoV 504 | Reduced appetite, deep abdominal respirations<br>Score:0/6/6/6                           | Reduced appetite, quiet<br>Score: 3/0/0/3                                                                          | Lung weight: 23.33g/ animal 3.94kg<br>RUL 10% dorsal, LML 10% dorsal, LLL dorsal 10%                                                                                                                                       |
|         | CoV 505 | Reduced appetite, slow, irregular respirations<br>Score: 0/6/8/6                         | Reduced appetite<br>Score:3/0/0/3                                                                                  | Lung weight: 28.37g/animal 6.06kg<br>RUL dorsal 10%; RML dorsal 10%, ventral 10%; RLL dorsal 20%, ventral 50%, LML dorsal 30%, ventral 20%; LLL 70% dorsal dark red                                                        |
|         | CoV 506 | Reduced appetite, increased abdominal respirations, hunched posture<br>Score: 0/5/15/8/8 | Reduced appetite, hunched posture<br>Score: 8/8/5/8                                                                | Lung weight: 23.8g/animal 5.16kg<br>RLL 10% ventral consolidated<br>Liver: pale                                                                                                                                            |
|         | CoV 507 | Reduced appetite, slightly irregular respirations<br>Score: 0/6/6/6                      | Reduced appetite, slightly irregular respirations<br>Score: 6/3/3/3                                                | Lung weight: 37.86g/animal 4.91kg<br>RUL 50% ventral; RLL dorsal % ventral 50% bright red<br>Lung FTC<br>Liver pale                                                                                                        |
|         | CoV 508 | Score: 0/0/0/0                                                                           | Reduced appetite,<br>Score: 3/0/0/0                                                                                | Lung weight:27.59g/animal 4.87kg<br>RUL 10% dorsal; RLL 20% dorsal,<br>Liver pale                                                                                                                                          |
|         | CoV 509 | Reduced appetite, slow & tired<br>Score: 0/5/8/5                                         | Slow & tired<br>score: 5/5/0/0                                                                                     | Lung weight: 20.83g/animal 4.01kg<br>RLL 10% dorsal, 20% ventral bright red<br>Liver pale                                                                                                                                  |

148

149 **Table S1: Clinical scoring and necropsy notes of infected animals.** AGMs were scored daily

150 for clinical signs of disease including changes in general appearance, respiration, food intake,

151 fecal output as well as locomotion. Macroscopic scoring of organs was performed during

152 necropsies (day 7 post-infection).

153

154

Table S2

| Variant | Animal | D0 | D1 | D3 | D5 | D7 |
|---------|--------|----|----|----|----|----|
| D614G   | 499    | 0  | 1  | 1  | 1  | 1  |
|         | 500    | 0  | 0  | 0  | 0  | 1  |
|         | 501    | 0  | 1  | 1  | 1  | 1  |
|         | 502    | 0  | 0  | 0  | 0  | 1  |
|         | 503    | 0  | 1  | 2  | 2  | 2  |
| B.1.1.7 | 504    | 0  | 2  | 1  | 1  | 0  |
|         | 505    | 0  | 2  | 0  | 1  | 0  |
|         | 506    | 0  | 0  | 0  | 0  | 0  |
|         | 507    | 0  | 0  | 1  | 0  | 1  |
|         | 508    | 0  | 2  | 2  | 0  | 0  |
|         | 509    | 0  | 1  | 1  | 3  | 1  |

155

156 **Table S2: Radiographic scoring of lungs following infection.** Ventro-dorsal and right/left

157 lateral radiographs were taken on clinical exam days prior to any other procedures (e.g.

158 bronchoalveolar lavage, nasal flush). Radiographs were evaluated and scored for the presence of

159 pulmonary infiltrates by two board-certified clinical veterinarians according to a standard scoring

160 system (7). Briefly, each lung lobe (upper left, middle left, lower left, upper right, middle right,

161 lower right) was scored individually based on the following criteria: 0 = normal examination; 1

162 = mild interstitial pulmonary infiltrates; 2 = moderate interstitial pulmonary infiltrates, perhaps

163 with partial cardiac border effacement and small areas of pulmonary consolidation (alveolar

164 patterns and air bronchograms); and 3 = pulmonary consolidation as the primary lung pathology,

165 seen as a progression from grade 2 lung pathology. At study completion, thoracic radiograph

166 findings were reported as a single radiograph score for each animal on each exam day. To obtain

167 this score, the scores assigned to each of the six lung lobes were added together and recorded as

168 the radiograph score for each animal on each exam day. Scores can range from 0 to 18 for each

169 animal on each exam day.

170

171

172

173 **References**

- 174 1. E. Haddock, F. Feldmann, W. L. Shupert, H. Feldmann, Inactivation of SARS-CoV-2  
175 Laboratory Specimens. *Am J Trop Med Hyg*, (2021).
- 176 2. N. van Doremalen et al., Intranasal ChAdOx1 nCoV-19/AZD1222 vaccination reduces  
177 shedding of SARS-CoV-2 D614G in rhesus macaques. *bioRxiv*, 2021.2001.2009.426058  
178 (2021).
- 179 3. V. J. Munster et al., Subtle differences in the pathogenicity of SARS-CoV-2 variants of  
180 concern B.1.1.7 and B.1.351 in rhesus macaques. *bioRxiv*, 2021.2005.2007.443115  
181 (2021).
- 182 4. L. J. a. M. Reed, H., A Simple Method of Estimating Fifty Percent Endpoints. . *American*  
183 *Journal of Hygiene* 27, 493-497 (1938).
- 184 5. K. Rosenke et al., Defining the Syrian hamster as a highly susceptible preclinical model  
185 for SARS-CoV-2 infection. *Emerg Microbes Infect* 9, 2673-2684 (2020).
- 186 6. R. Wölfel et al., Virological assessment of hospitalized patients with COVID-2019.  
187 *Nature* 581, 465-469 (2020).
- 188 7. D. L. Brining et al., Thoracic radiography as a refinement methodology for the study of  
189 H1N1 influenza in cynomolgus macaques (*Macaca fascicularis*). *Comp Med* 60, 389-  
190 395 (2010).

191
